# Supplementary material
Source: MDPI journal article supplement (https://www.mdpi.com/2071-1050/14/8/4498)

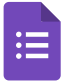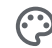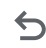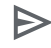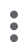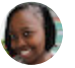

## MSC electronic quiz

Questions

Responses

19

Settings

Total points: 0

# Sustainable construction

Thanks for taking part in this questionnaire/survey. The purpose of this is to investigate whether the principles of sustainable construction are implemented in the South African Construction industry. The case study is that of Belhar Social Housing project.

This survey is only 22 questions long and will take approximately 10-15 minutes.

### Ethical Issues - Your rights

Information in this study will be kept strictly confidential (i.e. information gathered will not be passed to others) and will be completely anonymous. At no point during this questionnaire will you be asked to reveal any personal information such as your name or contact information. Please be aware that data obtained through this research may be reproduced and published in a variety of forms for a range of audiences with an interest in this research.

Participation in this study is entirely voluntary and you may withdraw at any time. All answers that required reasons why, can be delivered and as little or as much detail as you feel is sufficient. If you have any questions or would like to send extra information, please contact the researcher at [dlaminilindelwa@yahoo.com](mailto:dlaminilindelwa@yahoo.com).

1. By ticking the box you understand all the information above and in the sent email and willing to participate in this survey \*This question is required. \*

☐

I fully understand the above information and I'm willing to participate in the study

2. Gender \*

☐

Male

☐

Female

3. Age \*

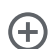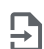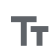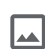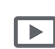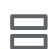

☒ 26 - 33

☐ 34 - 41

☐ 42 - 48

☐ 48+

#### 4. Education level \*

☐ Matric

☐ Degree/Diploma

☐ Masters

☐ PhD

☐ Other (short course certificates)

#### 5. Position within your organisation \*

Short answer text

#### 6. Years of experience \*

☐ 0-3 years

☐ 3-5 years

☐ 6-10 years

☐ 10+ years

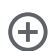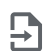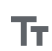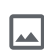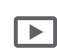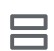

- ☐ Very Aware
- ☐ Aware
- ☐ Heard About It
- ☐ Not Very Aware
- ☐ Know Nothing About It

8. The Government should promote sustainability within construction more \*

- ☐ Strongly Agree
- ☐ Agree
- ☐ No Opinion
- ☐ Disagree
- ☐ Strongly Disagree

9. Are you aware of the Building Standards and Regulations (as amended) Act 103 of 1977 \*

- ☐ Aware
- ☐ Not Aware

10. If you're Aware, is it in use within your organisation? (If No, please state whether you think it should be in use and why.) \*

- ☐ yes
- ☐ No

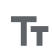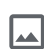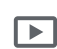

11. How effective is the Building Standards and Regulations (as amended) Act 103 of 1977 in helping sustainability; within South Africa? \*

- ☐ Very Effective
- ☐ Effective
- ☐ Not Sure
- ☐ Not Very Effective
- ☐ Not At All Effective

12. How effective is the Building Standards and Regulations (as amended) Act 103 of 1977 in helping sustainability within Calgro M3 (if used)? \*

- ☐ Very Effective
- ☐ Effective
- ☐ Not Sure
- ☐ Not Very Effective
- ☐ Not At All Effective

13. Is sustainability construction cost effective in the long term, short term or both?(Take in consideration initial costings of housing and energy savings thereafter) \*

- ☐ Long term
- ☐ Short term

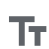

Both

14. Do you think it should be compulsory for all construction to move towards sustainable construction instead of conventional construction? (If No, please state why) \*

Long answer text

15. Ecological design and procurement are the answer to meeting sustainability in construction? \*

- ☐ Strongly Agree
- ☐ Agree
- ☐ Neutral
- ☐ Disagree
- ☐ Strongly Disagree

16. Are centralised heat pumps a good solution to creating sustainable housing and meeting energy use standards for sustainability? \*

- ☐ yes
- ☐ No
- ☐ Not sure

17. There's less knowledge and understanding on how sustainable construction could benefit construction/development companies? \*

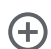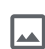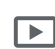

☒ Yes

☐ No

18. Will sustainable construction knowledge be able to reduce construction costs in the future? To meet Green Building Council of South Africa requirements for sustainability? \*

☐ yes

☐ No

19. Future technological advances will allow for the construction costs to be reduced and meet projected targets? \*

☐ Agree

☐ Neutral

☐ Disagree

20. Sustainable construction is one of the ways to reducing global warming? \*

☐ Agree

☐ Neutral

☐ Disagree

21. The environment and sustainability are more important than saving costs on constructing homes to developers \*



☒ Agree

☐ Neutral

☐ Disagree

22. Implementation of strategies can be costly and the reality is that this can put developers off being sustainable.

\*

☐ Agree

☐ Neutral

☐ Disagree

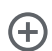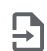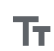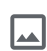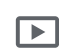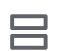

Supplement: s1 [file s1]
