# Supplementary material
Source: MDPI journal article supplement (https://www.mdpi.com/2071-1050/14/8/4498)

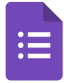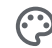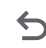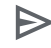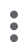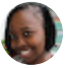

Copy of Residents' Awareness and perception on water and energy

Questions

Responses

106

Settings

Total points: 0

## Awareness & Perception on water and energy efficiency Survey

### Resident's Perceived Green Initiatives efficiency Survey

Thanks for taking part in this questionnaire/survey. The purpose of this is to investigate whether the sustainability measures implemented and certified by GBCSA at Belhar Social Housing benefits the residents of Belhar social housing project.

This survey is only 11 questions long and will take approximately 5 - 10 minutes.

### Ethical Issues - Your rights

Information in this study will be kept strictly confidential (i.e. information gathered will not be passed to others) and will be completely anonymous. At no point during this questionnaire will you be asked to reveal any personal information such as your name or contact information. Please be aware that data obtained through this research may be reproduced and published in a variety of forms for a range of audiences with an interest in this research.

Participation in this study is entirely voluntary and you may withdraw at any time. If you have any questions or would like to send extra information, please contact the researcher at [dlaminilindelwa@yahoo.com](mailto:dlaminilindelwa@yahoo.com)

1. By ticking the box you understand all the information above and in the sent email and willing to participate in this survey \*This question is required.

\*

☐ I fully understand the above information and I'm willing to participate in the study

2. Gender \*

☐ Male

☐ Female

3. Age

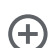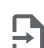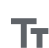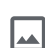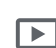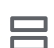

☐ 26 - 33

☐ 34 - 41

☐ 42 - 48

☐ 49+

4. How long have lived in Belhar Garden Estate

☐ 0 - 11 months

☐ 1- 2 yrs

☐ 2+ years

1. Are you aware that Belhar Gardens is EDGE rated for water and energy efficiency?

☐ Not aware

☐ Aware

☐ Very Aware

2. Are you aware of edge rated initiatives for water saving in your unit?

☐ Not aware

☐ Aware

☐ Very Aware

3. Are you aware of edge rated initiatives for energy saving in your unit?

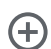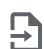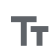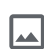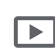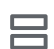

- ☐ Aware
- ☐ Very Aware

4. I am aware of all energy saving tools/measures in the unit I occupy

- ☐ Not aware
- ☐ Aware
- ☐ Very Aware

5. The energy initiatives in the unit help me to use water sparingly

- ☐ not in agreement
- ☐ somewhat in agreement
- ☐ neutral
- ☐ mostly in agreement
- ☐ completely in agreement

6. The information displayed on energy meters helps me reduce the usage?

- ☐ Agree
- ☐ neutral
- ☐ Disagree

7. I am using less energy now than when I was in my previous home?

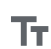

☐ neutral

☐ Disagree

8. I am satisfied that the water saving measures in my unit are very effective.

☐ Agree

☐ neutral

☐ Disagree

...

9. I am satisfied that the water flow restrictors and water meters in my unit is very durable.

☐ Agree

☐ neutral

☐ Disagree

10. I am satisfied that the information displayed on water meters helps to reduce usage?

☐ Agree

☐ neutral

☐ Disagree

11. I am paying less for water and electricity now than in my previous home?

☐ Agree

☐ neutral

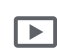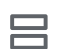

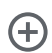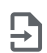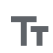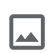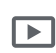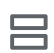

Supplement: s1 [file s1]
